# Supplementary material for: Identification of the Characteristic Genes and their Roles in Lung Adenocarcinoma Lymph Node Metastasis through Machine Learning Algorithm
Source: Hindawi journal article supplement (doi:10.1155/2022/1968829), 2022-10-12

**Figure S1. Immunotherapy difference between high and low risk patients**

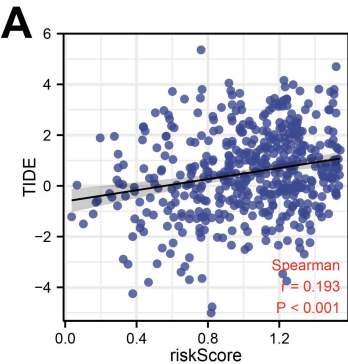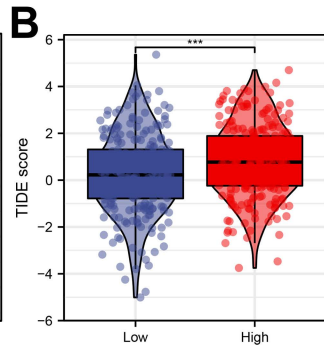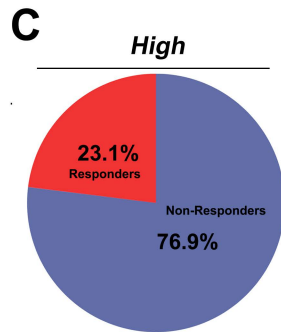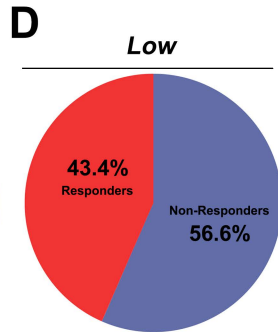

# Figure S2. Biological enrichment of high and low risk patients

## A

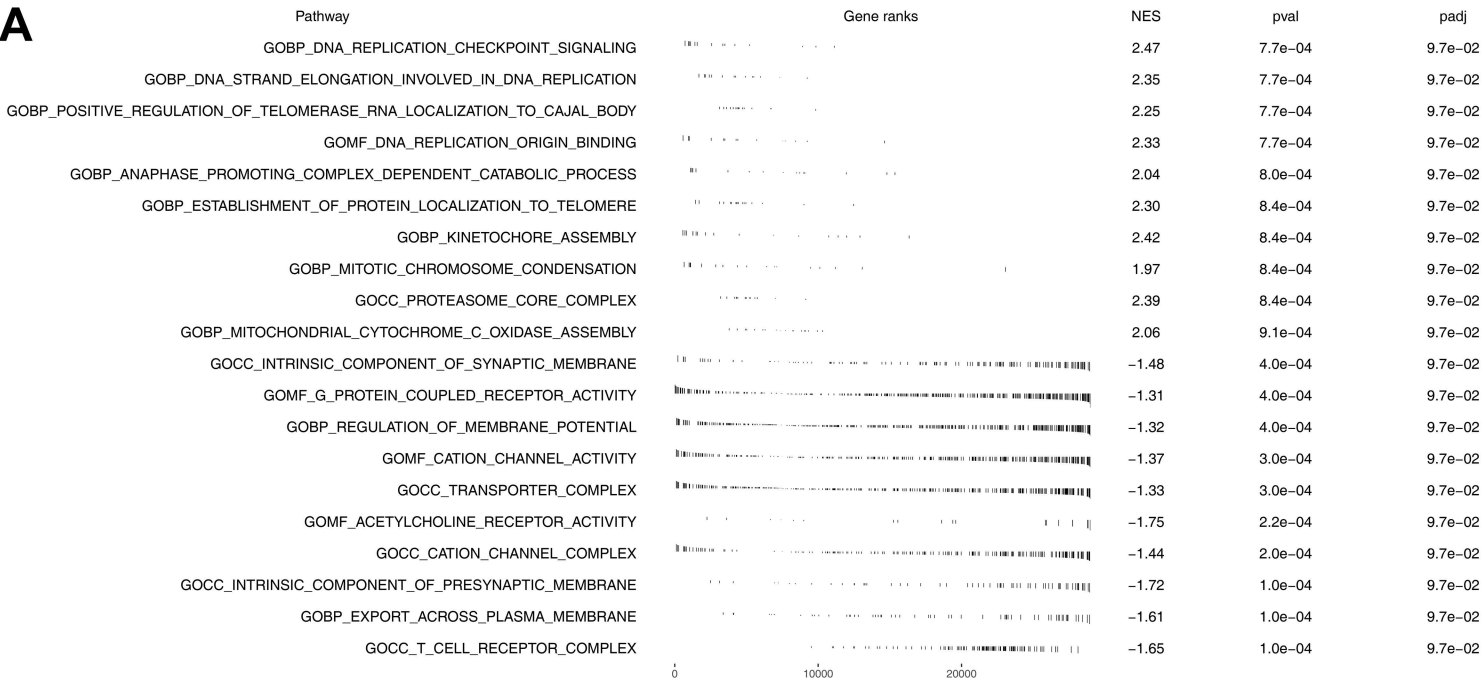

## B

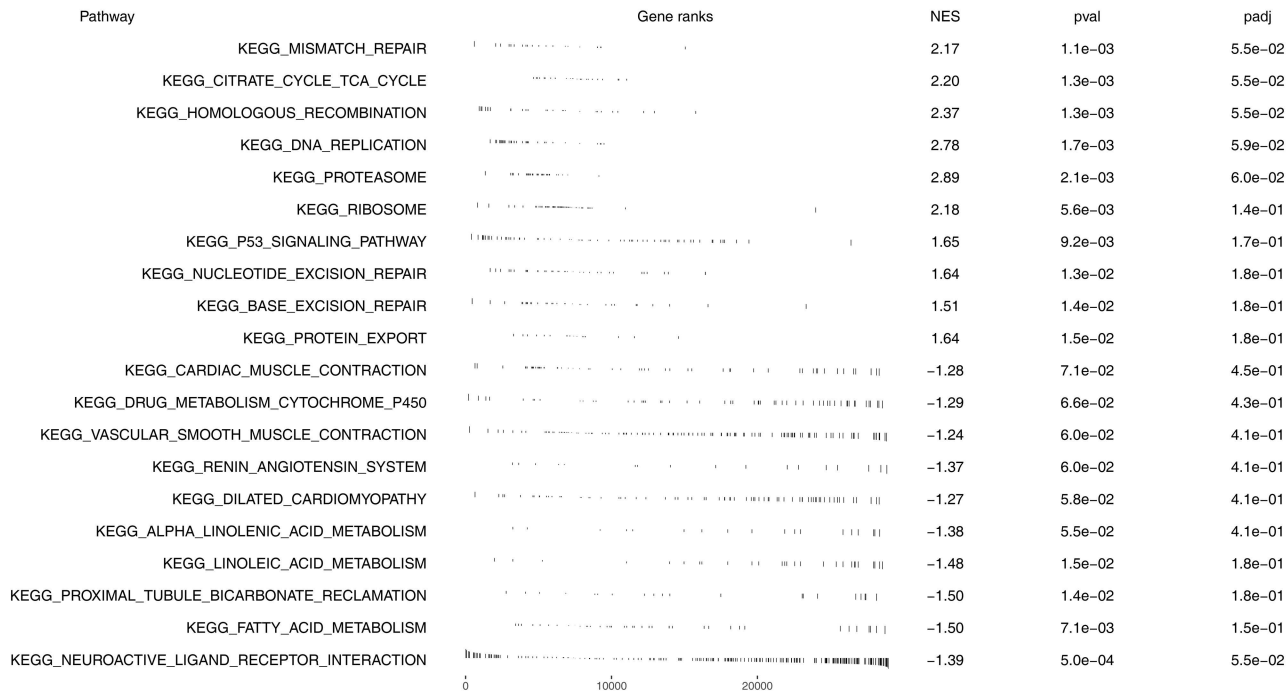

# Figure S3. Biological enrichment of patients with high and low MAS1L expression

## A

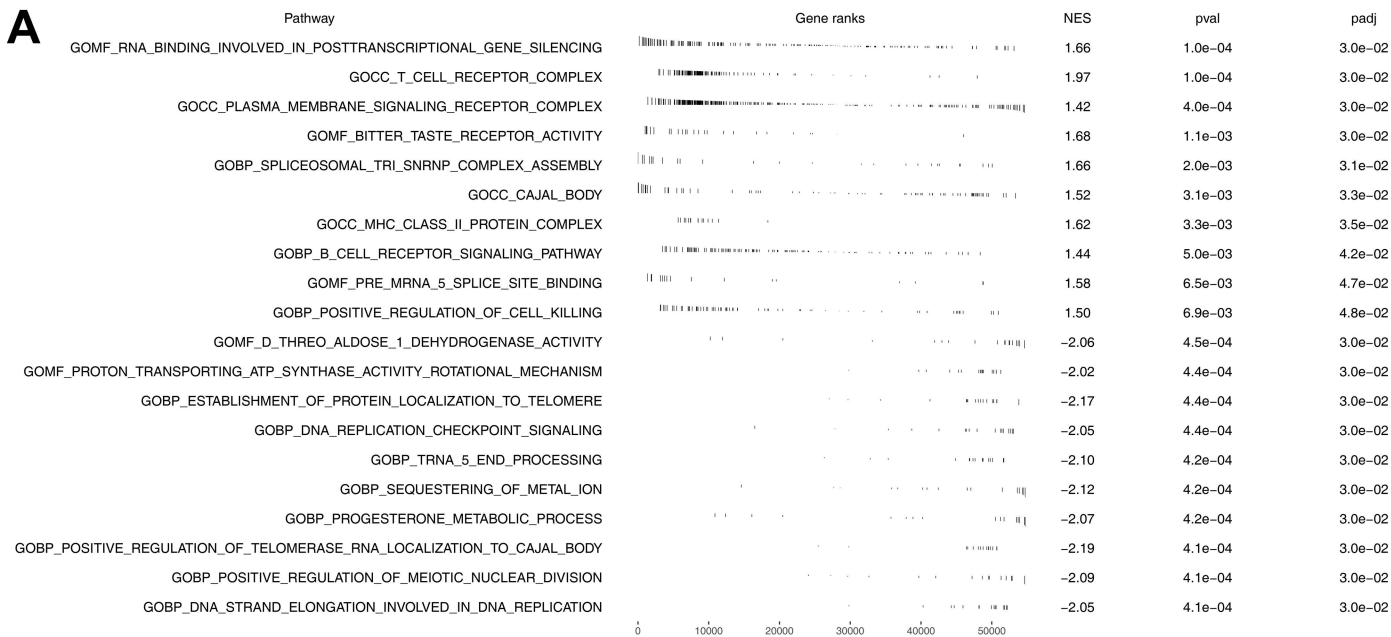

## B

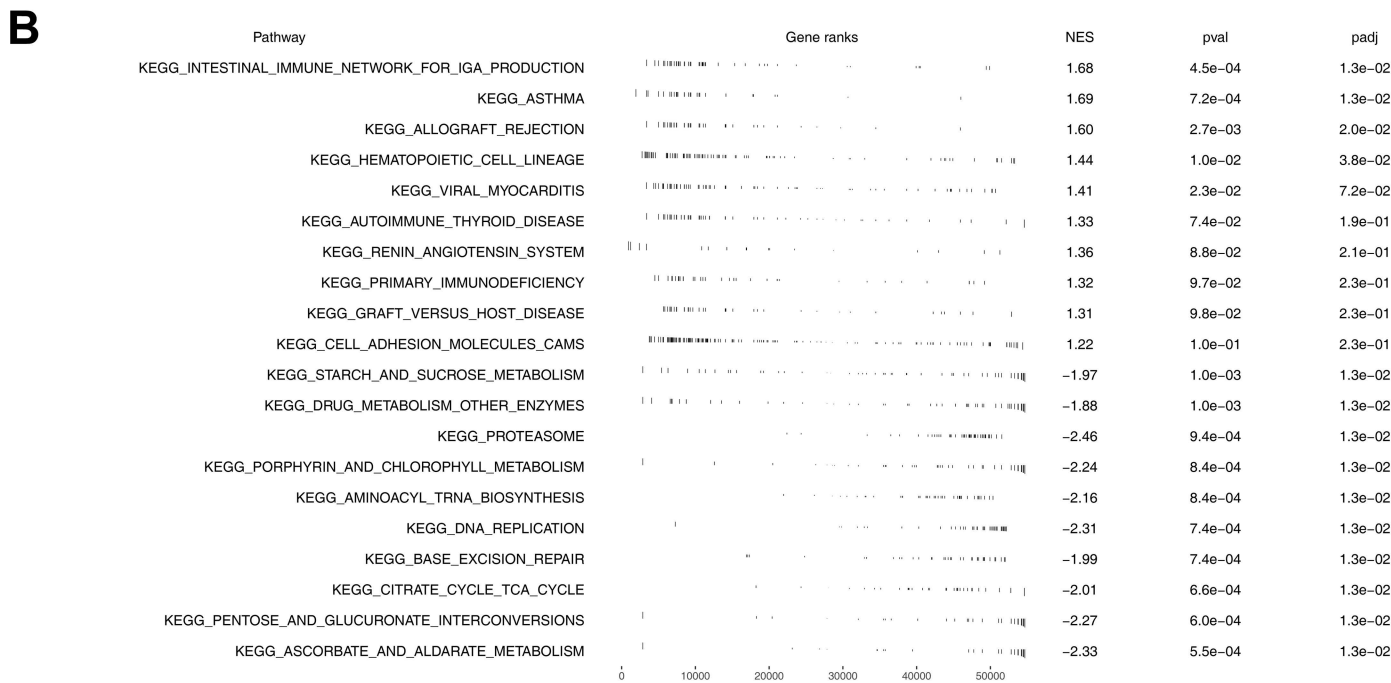

Supplement: f1 [file 1968829.f1.pdf]
